# Supplementary material
Source: bioRxiv or medRxiv preprint supplement (https://medrxiv.org/highwire/filestream/88588/field_highwire_adjunct_files/0/2020.07.03.20145094-1.pdf)
Supplement: Supplementary file [file 2020.07.03.20145094-1.pdf]

**eFigure 1. Study participant flow chart**

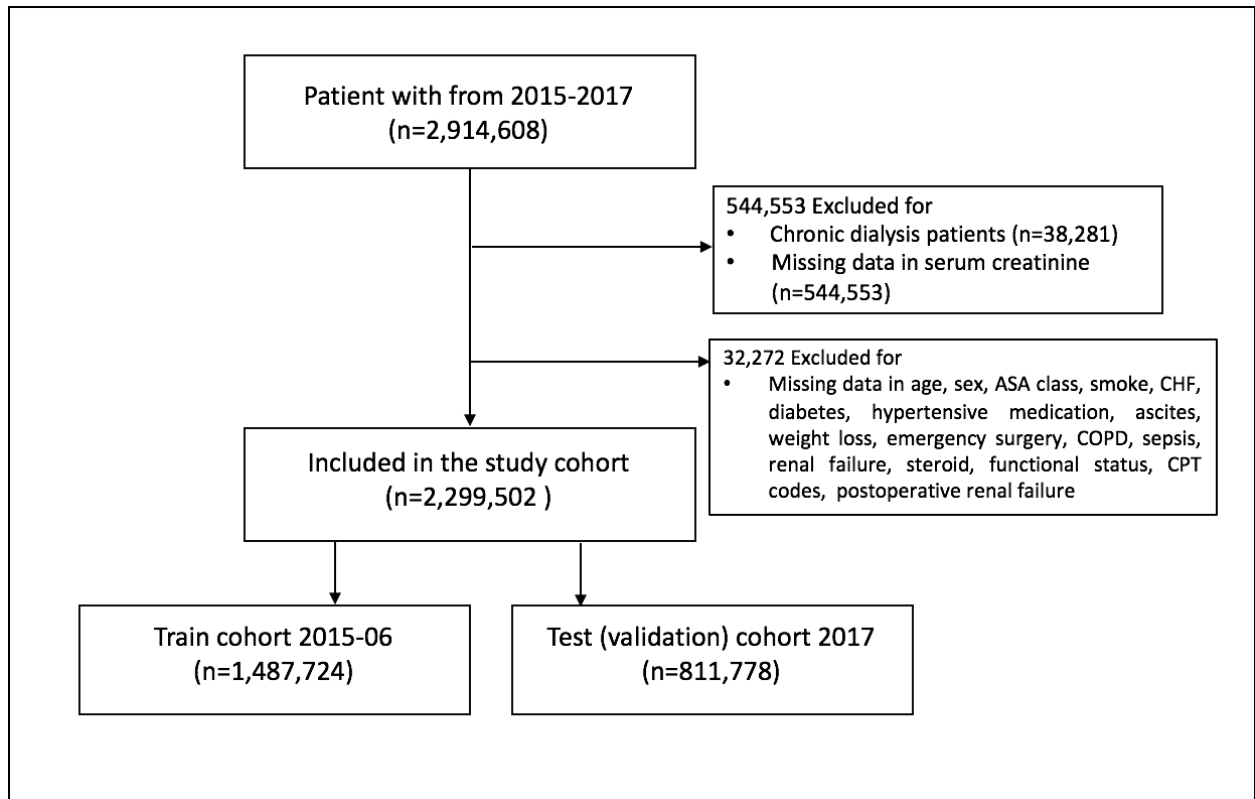

**eFigure 2. Unadjusted rates of postoperative AKI requiring dialysis according to surgery type**

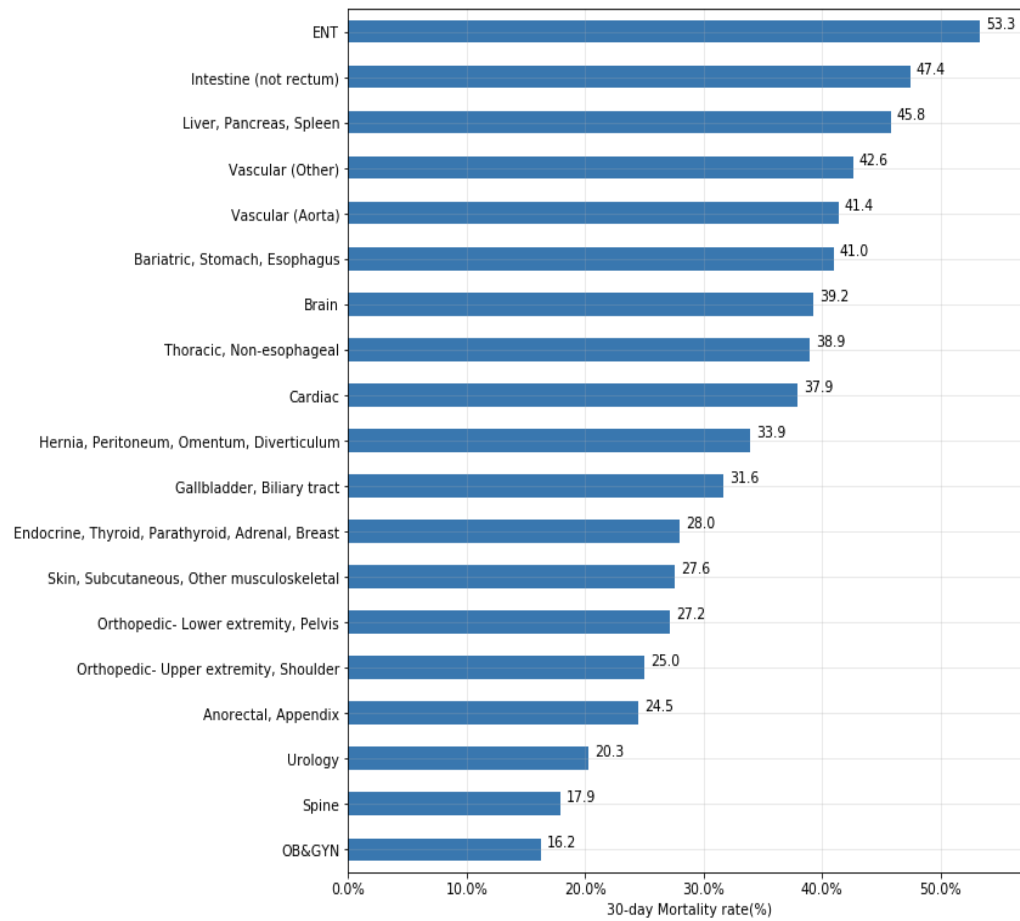

**eFigure 3. Calibration plot for postoperative acute kidney injury. Observed vs expected AKI-D risk**

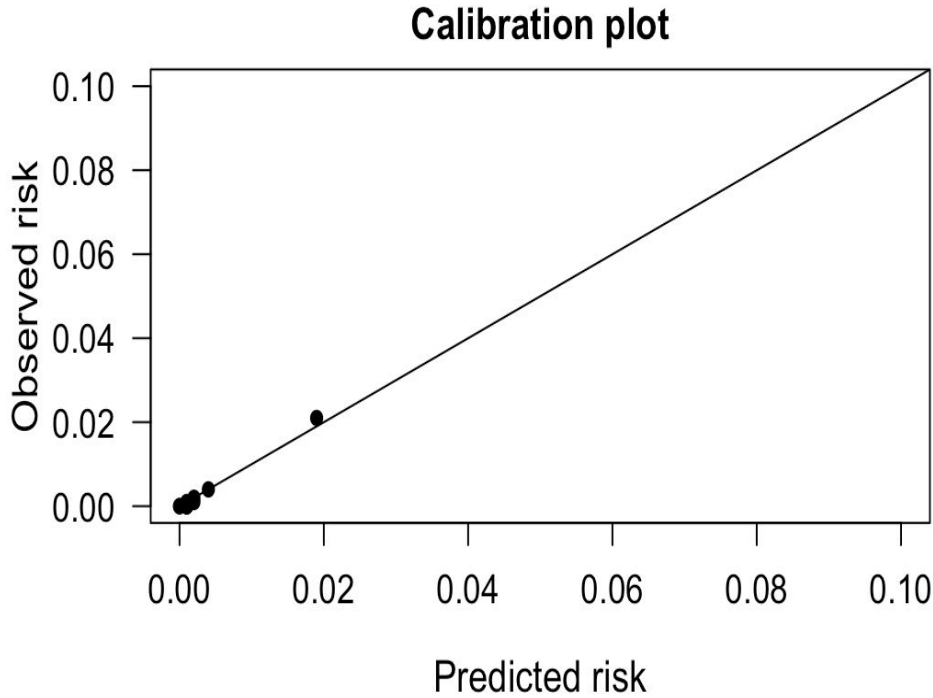

**eFigure 4. Mobile web application of renal risk model**

| Prediction Model                                                                                                                                                                                                                                                                                                                                                                                                                                                                                                                                                                                                                                                                                                                                                                                                                                                                                                           | Prediction Model                                                                                                                                            |
|----------------------------------------------------------------------------------------------------------------------------------------------------------------------------------------------------------------------------------------------------------------------------------------------------------------------------------------------------------------------------------------------------------------------------------------------------------------------------------------------------------------------------------------------------------------------------------------------------------------------------------------------------------------------------------------------------------------------------------------------------------------------------------------------------------------------------------------------------------------------------------------------------------------------------|-------------------------------------------------------------------------------------------------------------------------------------------------------------|
| <h3>Acute Kidney Injury Risk Model</h3> <p>* 30-day postoperative risk of AKI</p> <p>Age: <input type="text" value="67"/></p> <p>History of Congestive Heart Failure: <input type="button" value="Yes"/></p> <p>History of Diabetes :<br/><input type="button" value="Insulin Dependent"/></p> <p>Ascites: <input type="button" value="No"/></p> <p>Emergency Surgery: <input type="button" value="Yes"/></p> <p>Acute kidney injury prior to surgery: <input type="button" value="Yes"/></p> <p>Sepsis prior to surgery: <input type="button" value="SIRS"/></p> <p>Preop Serum Creatinine(mg/dL): <input type="text" value="2.5"/></p> <p>Preop Hematocrit(%): <input type="button" value="0-24"/></p> <p>Preop Serum Sodium (mEq/L) : <input type="button" value="0-130"/></p> <p>Surgery Type :<br/><input type="button" value="Orthopedic-lower extremity, pelvis"/></p> <p><input type="button" value="submit"/></p> | <h3>Result</h3> <p><b>30-day Risk of AKI requiring dialysis: 28.36%</b></p> <p><input type="button" value="Go back"/></p> <p>* AKI: Acute Kidney Injury</p> |
